# Supplementary material for: Prospective Multicenter Randomized Intermediate Biomarker Study of Oral Contraceptive versus Depo-Provera for Prevention of Endometrial Cancer in Women with Lynch Syndrome
Source: Oxford University Press journal article supplement (doi:10.1158/1940-6207.capr-13-0020), 2013-05-03
Supplement: 19406207capr130020-sup-tab1.xlsx [file 19406207capr130020-sup-tab1.xlsx]

## Sheet: Sheet1
Supplementary Table S1. Probes and primers for real-time PCR biomarker assays
Transcript	Taqman primers and probe	Accession number
hEIG121	3210(+)CTTGCATAGCACCTTTGCAAG	NM_020777
	3135(-)CAGTGGGTGTTGCAGGATG
	3232(+)FAM-CTGCGGCGATTTGGGTGCC-BHQ1
	Detection = 240 molecules; Efficiency = 90%
hIGF-1	146(+)GCAATGGGAAAAATCAGCAG	M26544
	237(-)GAGGAGGACATGGTGTGCA
	217(-)FAM-CTTCACCTTCAAGAAATCACAAAAGCAGCA-BHQ1
	Detection = 160 molecules; Efficiency = 99%
hIGF-2	742(+)CGTGGCATCGTTGAGGAGT	NM_000612
	809(-)GTAGCACAGTACGTCTCCAGGAG
	766(+)FAM-TTCCGCAGCTGTGACCTGGCC-BHQ1
	Detection = 210 molecules; Efficiency = 89%
hIGF-IR	163(+)CGCAACGACTATCAGCAGCT	NM_000875
	238(-)AGATGAGCAGGATGTGGAGGT
	189(+)FAM-CCTGGAGAACTGCACGGTGATCGA-BHQ1
	Detection = 190 molecules; Efficiency = 96%
hIGFBP1	620(+)GGGACGCCATCAGTACC	NM_000596
	681(-)CCATTTTTTGATGTTGGTGAC
	638(+)FAM-ATGATGGCTCGAAGGCTCTCCA-BHQ1
	Detection = 220 molecules; Efficiency = 93%
hRALDH2	2002(+)AGGCCCTCCTCGCTCAC	NM_003888
	2071(-)TCTGCCCCAGAATGAGCTC
	2021(+)FAM-ACCCCTCCCTCTCTTCCAAGGAGATG-BHQ1
	Detection = 210 molecules; Efficiency = 96%
hSFRP1	720(+)GAGCCGGTCATGCAGTTCT	NM_003012
	786(-)CCTCCGGGAACTTGTCACA
	740(+)FAM-CGGCTTCTACTGGCCCGAGATGC-BHQ1
	Detection = 210 molecules; Efficiency = 95%
hSFPR4	1175(+)GCGCACCAGTCGTAGTAATCC	AF026692
	1246(-)TTCTTGGGACTGGCTGGTT
	1202(+)FAM-ACCAAAGGGAAAGCCTCCTGCTCC-BHQ1
	Detection = 200 molecules; Efficiency = 99%
Survivin	181(+)CCACTGCCCCACTGAGAAC	NM_001168
	255(-)GGCTCCCAGCCTTCCAG
	204(+)FAM-CAGACTTGGCCCAGTGTTTCTTCTGCT-BHQ1
	Detection = 191 molecules; Efficiency = 96%
h18S	1335(+)CGGCTTAATTTGACTCAACAC	M10098
	1401(-)ATCAATCTGTCAATCCTGTCC
	1359(+)AAACCTCACCCGGCCCG
	Amplicon-68 bases in length
hβ-actin	997(+)CCCTGGCACCCAGCAC	NM_001101
	1067(-)GCCGATCCACACGGAGTAC
	1020(+)ATCAAGATCATTGCTCCTCCTGAGCGC
	Amplicon-71 bases in length
h36B4	193(+)AGATGCAGCAGATCCGCAT	NM_001002
	263(-)GCGCATCATGGTGTTCTTG
	217(+)TTCGCGGGAAGGCTGTGGTG
	Amplicon-71 bases in length
